# Supplementary material for: Myeloproliferative disorder FOP-FGFR1 fusion kinase recruits phosphoinositide-3 kinase and phospholipase Cγ at the centrosome
Source: PubMed Central journal article supplement (PMC2373309; doi:10.1186/1476-4598-7-30), 2008-04-15

CEP110-FGFR1

FGFR1

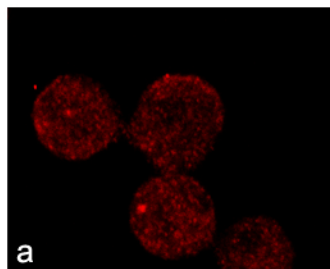

$\gamma$  Tubulin

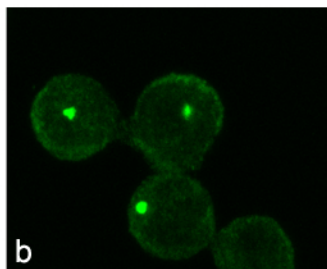

Overlay

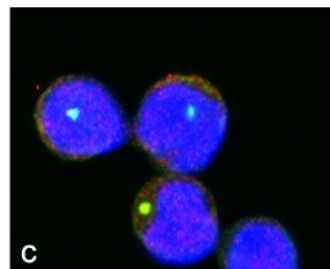

CEP110-FGFR1

pYXXM

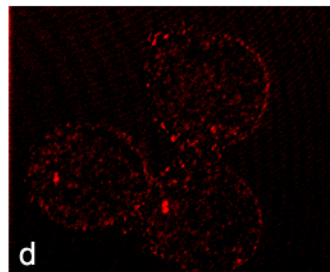

$\gamma$  Tubulin

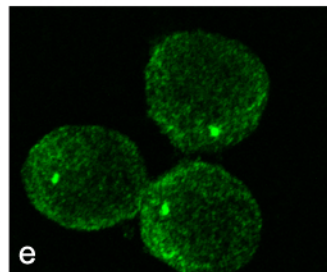

Overlay

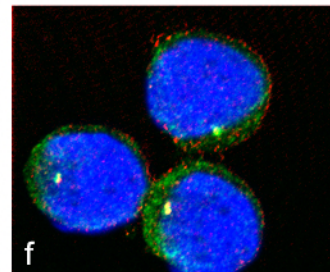

CEP110-FGFR1

p85

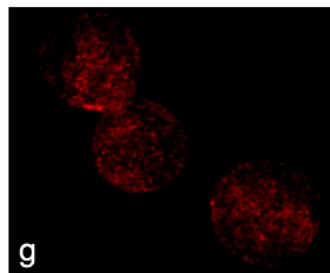

$\gamma$  Tubulin

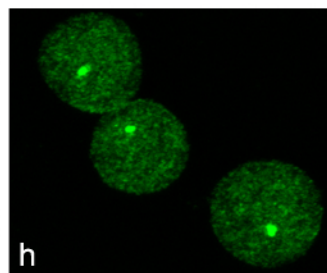

Overlay

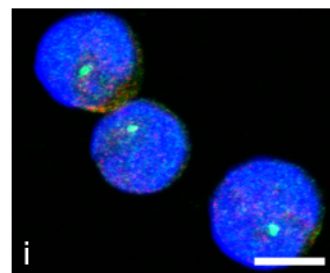

Supplement: 1476-4598-7-30-S1.pdf [file 1476-4598-7-30-S1.pdf]
